# Supplementary material
Source: Springer Nature journal article supplement (https://www.springermedizin.de/resource/supplementary/12936_2009_1230_MOESM2_ESM.pdf/9549278)

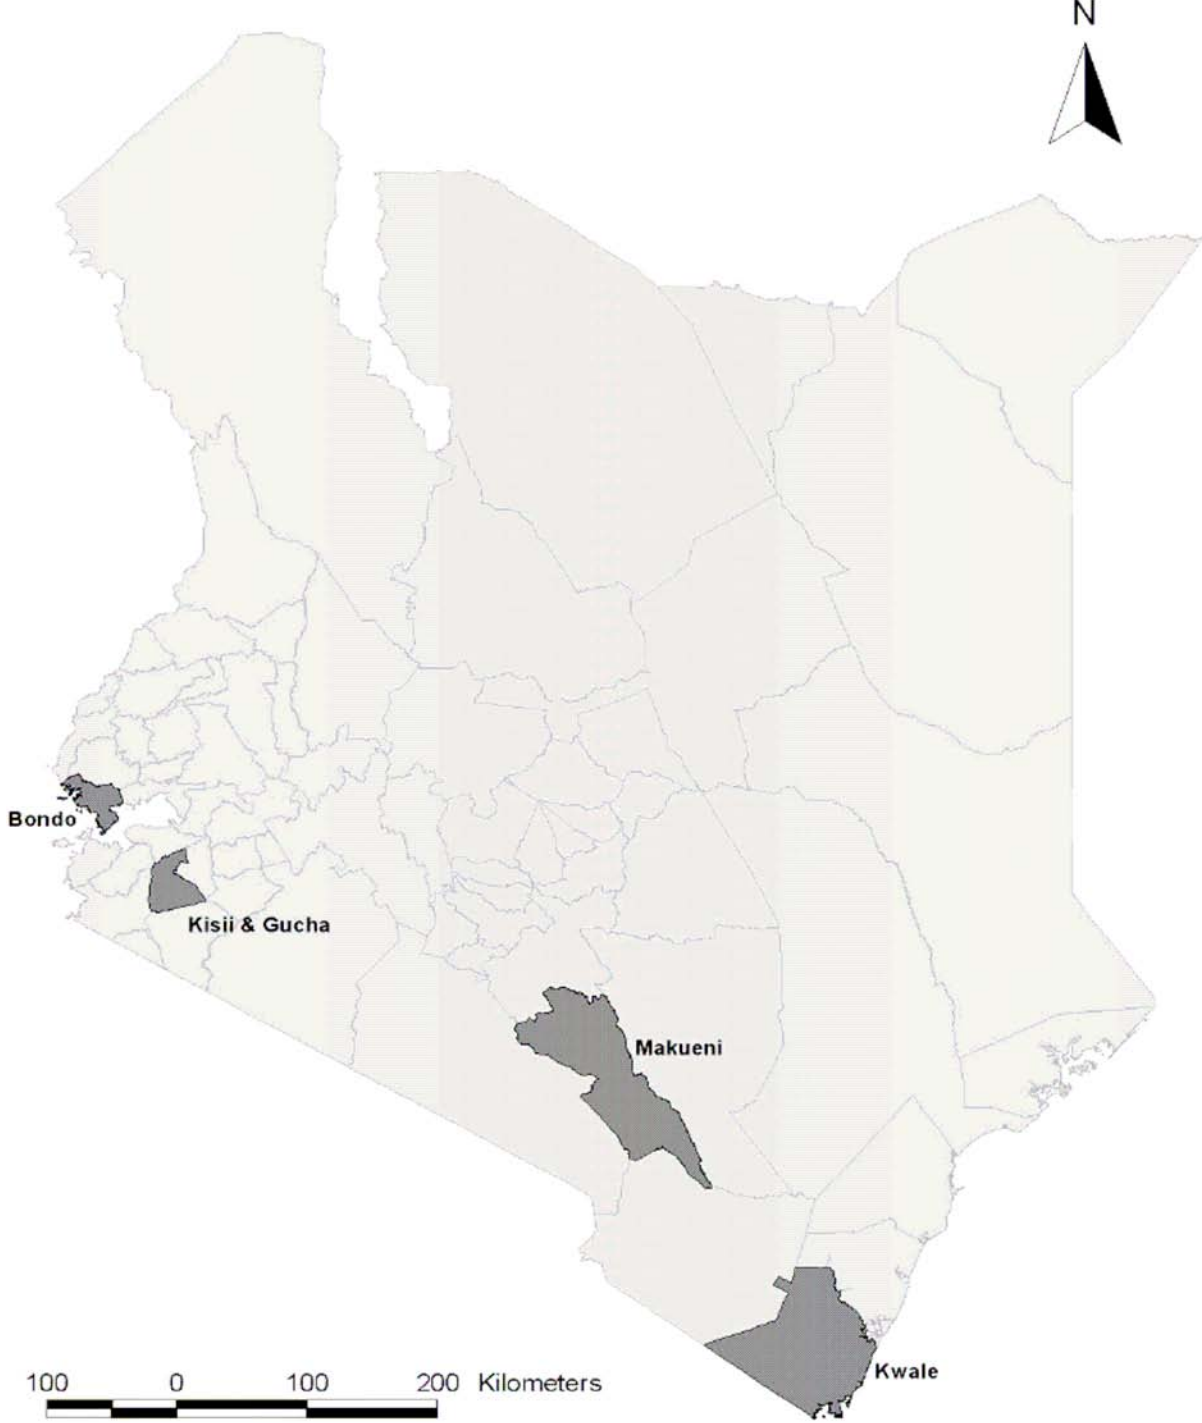

Source: Produced by Abdisalan Noor

Supplement: MOESM2 [file 9549278]
